# Supplementary material for: An α type gluco-oligosaccharide from brown algae Laminaria japonica stimulated the growth of lactic acid bacteria encoding specific ABC transport system components
Source: Royal Society of Chemistry journal article supplement (doi:10.1039/d2fo01981g), 2022-01-01
Supplement: d2fo01981g1.xlsx [file d2fo01981g1.xlsx]

## Sheet: Sheet1
Species	Strain ID	Phenotype on LJGO	Specific ABC transport system	Origin	Region	Accessoion number
L. rhamnosus	FXJWS19L2	G	Y	Human feces	Xinjiang	SAMN12429729
L. rhamnosus	FBJSY31L2	G	Y	Human feces	Beijing	SAMN12429682
L. rhamnosus	FHNFQ3L5	G	Y	Human feces	Henan	SAMN12429691
L. rhamnosus	FTJDG11L1	G	Y	Human feces	Tianjin	SAMN12429722
L. rhamnosus	FHeNJZ7L1	G	Y	Human feces	Henan	SAMN12429689
L. rhamnosus	FHENJZ4L2	G	Y	Human feces	Henan	SAMN12429688
L. rhamnosus	FJSSZ2L1	NG	N	Human feces	Jiangsu	SAMN12429709
L. rhamnosus	FJSWX3L2	NG	N	Human feces	Jiangsu	SAMN12429700
L. rhamnosus	FQHXN3M6	NG	N	Human feces	Qinghai	SAMN12429713
L. rhamnosus	FJSWX241	NG	N	Human feces	Jiangsu	SAMN12429703
L. rhamnosus	FXJWS12L6	NG	N	Human feces	Xinjiang	SAMN12429727
L. rhamnosus	FSCYA1L2	NG	N	Human feces	Sichuan	SAMN12429723
L. rhamnosus	FSDLZ7M12	NG	N	Human feces	Shandong	SAMN12429717
L. rhamnosus	FSHMX12	NG	N	Human feces	Shanghai	SAMN12429715
L. rhamnosus	FXJWS38L2	NG	N	Human feces	Xinjiang	SAMN12429733
L. rhamnosus	FZJHZ4L6	NG	N	Human feces	Zhejiang	SAMN12429737
L. rhamnosus	FHENJZ8L1	NG	N	Human feces	Henan	SAMN12429690
L. rhamnosus	JSWX224	NG	N	Human feces	Jiangsu	SAMN12429702
L. rhamnosus	FJSYC15	NG	N	Human feces	Jiangsu	SAMN12429706
L. rhamnosus	FXJWS13L6	NG	N	Human feces	Xinjiang	SAMN12429728
L. helveticus	DYNDL366	G	Y	Dairy product	Yunnan	SAMN24015094
L. helveticus	FSDJN10M6	G	Y	Dairy product	Shandong	SAMN24015095
L. helveticus	DYNDL321	G	Y	Dairy product	Yunnan	SAMN24015096
L. helveticus	6M3	G	Y	Dairy product	UN	SAMN15891278
L. helveticus	8G3	NG	N	Dairy product	UN	SAMN15891279
L. helveticus	DYNDL451	NG	N	Dairy product	Yunnan	SAMN24015097
L. helveticus	DYNDL252	NG	N	Dairy product	Yunnan	SAMN24015098
L. helveticus	DYNDL68M7	NG	N	Dairy product	Yunnan	SAMN24015099
L. helveticus	DYNDL838	NG	N	Dairy product	Yunnan	SAMN24015100
L. helveticus	DYNDL205	NG	N	Dairy product	Yunnan	SAMN24015101
L. paracasei	FHNFQ4L3	G	Y	Human feces	Henan	SAMN15891463
L. paracasei	FHNFQ20L8	G	Y	Human feces	Henan	SAMN15891464
L. paracasei	FHNMY65L3	G	Y	Human feces	Henan	SAMN15891470
L. paracasei	FQHXN23L6	G	Y	Human feces	Qinghai	SAMN15891481
L. paracasei	FNMGWLCB1L2	G	Y	Human feces	Inner Mongolia	SAMN15891476
L. paracasei	FBJSY22L1	G	Y	Human feces	Beijing	SAMN15891441
L. paracasei	FXJKS17M1	G	Y	Human feces	Xinjiang	SAMN15891505
L. paracasei	FZJHZ11L2	G	Y	Human feces	Zhejiang	SAMN15891510
L. paracasei	VCQQJ30173L8	G	Y	Chinese pickle	Chongqing	SAMN15891541
L. paracasei	FSDHZ5L7	G	Y	Human feces	Shandong	SAMN15891494
L. paracasei	FQHXN83L2	G	Y	Human feces	Qinghai	SAMN15891484
L. paracasei	FSDWH1L4	G	Y	Human feces	Shandong	SAMN15891502
L. paracasei	FSDLZ35M1	G	Y	Human feces	Shandong	SAMN15891499
L. paracasei	FJSSZ4L8	NG	N	Human feces	Jiangsu	SAMN15891474
L. paracasei	FBJCY3L2	NG	N	Human feces	Beijing	SAMN15891434
L. paracasei	FBJCY4L7	NG	N	Human feces	Beijing	SAMN15891435
L. paracasei	FCQHC12L3	NG	N	Human feces	Chongqing	SAMN15891445
L. paracasei	VCQYB7171M7	NG	N	Chinese pickle	Chongqing	SAMN15891544
L. paracasei	VCQWX3102L7	NG	N	Chinese pickle	Chongqing	SAMN15891533
L. paracasei	VCQWX5L7	NG	N	Chinese pickle	Chongqing	SAMN15891535
L. bulgaricus	M4D2A49	G	Y	Dairy product	UN	SAMN24015102
L. bulgaricus	DQHXNS17M6	NG	N	Dairy product	Qinghai	SAMN15890994
L. bulgaricus	DQHXNS18M41	NG	N	Dairy product	Qinghai	SAMN15890995
L. bulgaricus	DQHXNS2L1	NG	N	Dairy product	Qinghai	SAMN15890986
L. bulgaricus	DQHXNS1L21	NG	N	Dairy product	Qinghai	SAMN15890985
L. bulgaricus	DXJLHTS2M2	NG	N	Dairy product	Xinjiang	SAMN15890997
L. bulgaricus	DSCAB10M20	NG	N	Dairy product	Sichuan	SAMN15890996
L. bulgaricus	DSCAB12M4	NG	N	Dairy product	Sichuan	SAMN15891003
L. bulgaricus	DQHXNS12L4	NG	N	Dairy product	Qinghai	SAMN15891002
L. bulgaricus	DQHXNS8L6	NG	N	Dairy product	Qinghai	SAMN15891001
L. plantarum	FXJKS33M3	G	Y	Human feces	Xinjiang	SAMN15891378
L. plantarum	FXJCJ25M3	G	Y	Human feces	Xinjiang	SAMN15891373
L. plantarum	FXJSW29M6	G	Y	Human feces	Xinjiang	SAMN15891379
L. plantarum	FJSCZD5L9	G	Y	Human feces	Jiangsu	SAMN15891359
L. plantarum	FJLHD20M4	G	Y	Human feces	Jilin	SAMN15891353
L. plantarum	FGDLZ9M2	G	Y	Human feces	Guangdong	SAMN15891338
L. plantarum	FGDLZ8M3	G	Y	Human feces	Guangdong	SAMN15891337
L. plantarum	FGDLZ6M2	G	Y	Human feces	Guangdong	SAMN15891336
L. plantarum	FGDLZ1M5	G	Y	Human feces	Guangdong	SAMN15891334
L. plantarum	FGDLZ10M8	G	Y	Human feces	Guangdong	SAMN15891339
L. plantarum	FGDLZ2M10	G	Y	Human feces	Guangdong	SAMN15891335
L. johnsonii	FAHBZ615	G	Y	Human feces	Anhui	SAMN15891280
L. johnsonii	FGSYC6M3	G	Y	Human feces	Gansu	SAMN15891281
L. johnsonii	FHBZX13M2	G	Y	Human feces	Hubei	SAMN15891282
L. johnsonii	FHNXY70M2	G	Y	Chicken feces	Henan	SAMN15891283
L. johnsonii	FHUBES1M16	G	Y	Human feces	Hubei	SAMN21165663
L. johnsonii	FJLHD57L1	G	Y	Human feces	Jilin	SAMN21165664
L. johnsonii	FJLHD58L1	G	Y	Human feces	Jilin	SAMN15891284
L. johnsonii	FSCPS86M4	G	Y	Human feces	Sichuan	SAMN15891285
L. johnsonii	FSDQZ12L4	G	Y	Human feces	Shandong	SAMN21165665
L. johnsonii	QJSWX125M11	G	Y	Human vagina	Jiangsu	SAMN21165667
L. ruminis	FAHBZ17M1	G	Y	Human feces	Anhui	SAMN13156887
L. ruminis	FAHBZ18M4	G	Y	Human feces	Anhui	SAMN13156888
L. ruminis	FAHBZ22L1	G	Y	Human feces	Anhui	SAMN13156889
L. ruminis	FAHBZ53M1	G	Y	Human feces	Anhui	SAMN13156892
L. ruminis	FAHBZ56M1	G	Y	Human feces	Anhui	SAMN13156893
L. ruminis	FGSYC14L1	G	Y	Human feces	Gansu	SAMN13156895
L. ruminis	FGSYC25L1	G	Y	Human feces	Gansu	SAMN13156896
L. ruminis	FHNFQ26L1	G	Y	Human feces	Henan	SAMN13156909
L. ruminis	FHNFQ30L1	G	Y	Human feces	Henan	SAMN13156912
L. ruminis	M1DZ04L3	G	Y	Human feces	Xizang	SAMN13156957
L. crispatus	FAHXC2L1	G	Y	Chicken feces	Anhui	SAMN12869311
L. crispatus	FCQJJ9M2	G	Y	Chicken feces	Chongqing	SAMN12869312
L. crispatus	FGSYC18L1	G	Y	Human feces	Gansu	SAMN12869300
L. crispatus	FHNXY64M2	G	Y	Human feces	Henan	SAMN15891005
L. crispatus	FHNFQ15L11	G	Y	Human feces	Henan	SAMN12869302
L. crispatus	FHNFQ29L3	G	Y	Human feces	Henan	SAMN12869303
L. crispatus	FHNFQ37L2	G	Y	Human feces	Henan	SAMN12869304
L. crispatus	FHNFQ45L4	G	Y	Human feces	Henan	SAMN12869305
L. crispatus	FHNFQ56M4	G	Y	Human feces	Henan	SAMN12869306
L. crispatus	QJSWX113M3	G	Y	Human vagina	Jiangsu	SAMN12869324
L. gasseri	AHFY1	G	Y	Human feces	Anhui	SAMN15891180
L. gasseri	FJXPY26_L4	G	Y	Human feces	Jiangxi	SAMN15891252
L. gasseri	BJHD47	G	Y	Human feces	Beijing	SAMN15891182
L. gasseri	C1A31	G	Y	Human feces	Henan	SAMN21165654
L. gasseri	FAHBZ9L4	G	Y	Human feces	Anhui	SAMN21165672
L. gasseri	FGSYC18L5	G	Y	Human feces	Gansu	SAMN15891190
L. gasseri	FCQHC7L6	G	Y	Human feces	Chongqing	SAMN21165674
L. gasseri	FFJNDD6M1	G	Y	Human feces	Fujian	SAMN15891243
L. gasseri	FJXPY24_L2	G	Y	Human feces	Jiangxi	SAMN15891251
L. gasseri	FGSY23L3	G	Y	Human feces	Gansu	SAMN15891183
L. pentosus	17001	G	Y	Dairy product	Chongqing	SAMN24015103
L. pentosus	DL49	G	Y	Dairy product	Yunnan	SAMN24015104
L. pentosus	FGDLZ7M3	G	Y	Human feces	Guangdong	SAMN24015105
L. pentosus	FHNMY5M9	G	Y	Human feces	Henan	SAMN24015106
L. pentosus	FXJCJ17M1	G	Y	Human feces	Xinjiang	SAMN24015107
L. pentosus	HY311	G	Y	Dairy product	Sichuan	SAMN24015108
L. pentosus	FZJHZD217	G	Y	Human feces	Zhejiang	SAMN24015109
L. pentosus	RS142	G	Y	Dairy product	Sichuan	SAMN24015110
L. pentosus	FHuNHHMY67L3	G	Y	Human feces	Hunan	SAMN24015111
L. salivarius	FYNDL5M1	NG	N	Human feces	Yunnan	SAMN21437728
L. salivarius	FBJSY20_2	NG	N	Human feces	Beijing	SAMN12616902
L. salivarius	FBJSY612	NG	N	Human feces	Beijing	SAMN15891623
L. salivarius	FCQNA25M6	NG	N	Human feces	Chongqing	SAMN12616905
L. salivarius	FFJND2L3	NG	N	Human feces	Fujian	SAMN15891625
L. salivarius	FGSYC47M10	NG	N	Human feces	Gansu	SAMN12616908
L. salivarius	FHNXY73M9	NG	N	Chicken feces	Henan	SAMN12616910
L. salivarius	FJLHD2M8	NG	N	Human feces	Jilin	SAMN12616918
L. salivarius	FJLHD4M1	NG	N	Human feces	Jilin	SAMN12616920
L. salivarius	FJLHD9M1	NG	N	Human feces	Jilin	SAMN12616922
L. reuteri	FJSXYWG3L1	NG	N	Cattle feces	Jiangsu	SAMN15891582
L. reuteri	FHNXY71L8	NG	N	Chicken feces	Henan	SAMN15891580
L. reuteri	FYNLJ83L8	NG	N	Pig feces	Yunnan	SAMN15891612
L. reuteri	FSH14M1	NG	N	Human feces	Shanghai	SAMN15891599
L. reuteri	FSCPS79L4	NG	N	Dog feces	Sichuan	SAMN15891590
L. reuteri	FXJCJ4M2	NG	N	Human feces	Xinjiang	SAMN15891604
L. reuteri	FAHBZ3L1	NG	N	Human feces	Anhui	SAMN15891570
L. reuteri	FNXYCHL81L1	NG	N	Pigeon feces	Ningxia	SAMN15891585
L. reuteri	FJLHD58L2	NG	N	Chicken feces	Jilin	SAMN15891581
L. reuteri	FWXBH12M3	NG	N	Human feces	Jiangsu	SAMN15891603
L. mucosae	FGSYC17L3	NG	N	Human feces	Gansu	SAMN13220092
L. mucosae	FGSYC23L4	NG	N	Human feces	Gansu	SAMN13220094
L. mucosae	FGSYC27L1	NG	N	Human feces	Gansu	SAMN13220095
L. mucosae	FGSYC42L4	NG	N	Human feces	Gansu	SAMN13220096
L. mucosae	FGSYC43L5	NG	N	Human feces	Gansu	SAMN13220097
L. mucosae	FJSWX18M1	NG	N	Human feces	Jiangsu	SAMN13220122
L. mucosae	FJSWX20M1	NG	N	Human feces	Jiangsu	SAMN13220124
L. mucosae	FJSWX28M2	NG	N	Human feces	Jiangsu	SAMN13220127
L. mucosae	FSH12M2	NG	N	Human feces	Shanghai	SAMN13220132
L. mucosae	FYNLJ83L1	NG	N	Pig feces	Yunnan	SAMN13220142
L. fermentum	FWXBH11_1	NG	N	Human feces	Jiangsu	SAMN15891084
L. fermentum	FBJSY31_4	NG	N	Human feces	Beijing	SAMN15891021
L. fermentum	FJSWX25_2	NG	N	Human feces	Jiangsu	SAMN15891054
L. fermentum	FJSWX1_1	NG	N	Human feces	Jiangsu	SAMN15891046
L. fermentum	FBJSY21_1	NG	N	Human feces	Beijing	SAMN15891019
L. fermentum	FJSWX213	NG	N	Human feces	Jiangsu	SAMN15891053
L. fermentum	FGSYC50M4	NG	N	Human feces	Gansu	SAMN15891037
L. fermentum	FBJSY61_3	NG	N	Human feces	Beijing	SAMN15891130
L. fermentum	FBJSY24_1	NG	N	Human feces	Beijing	SAMN15891020
L. fermentum	FCQ6L1	NG	N	Human feces	Chongqing	SAMN15891023
Abbreviation: G, growth; NG, no growth; Y, yes; N, no.
